# Supplementary material for: New C3v-symmetrical tribenzotriquinacenes bearing extended and oxy-functionalised alkyl groups at their benzhydrylic bridgeheads
Source: Royal Society of Chemistry journal article supplement (doi:10.1039/c0ob00337a), 2010-01-01
Supplement: c0ob00337a.pdf [file c0ob00337a.pdf]

**Organic & Biomolecular Chemistry 2010**

**SUPPORTING INFORMATION**

**New C<sub>3v</sub>-Symmetrical Tribenzotriquinacenes Bearing Extended and Oxy-functionalised Alkyl Groups at Their Benzhydrylic Bridgeheads**

***Ehsan U. Mughal and Dietmar Kuck\****

*Department of Chemistry, Bielefeld University,  
Universitätsstraße 25, 33615 Bielefeld, Germany*

**Contents**

| <b><sup>1</sup>H-NMR spectra of compound 7–12 and 14–21</b>                                                                               | <b>Page</b> |
|-------------------------------------------------------------------------------------------------------------------------------------------|-------------|
| 12d-Methyl-4b,8b,12b-tris(2-oxopropyl)-4b,8b,12b,12d-tetrahydrodibenzo[2,3:4,5]pentaleno[1,6- <i>ab</i> ]indene ( <b>7</b> )              | 3           |
| 12d-Methyl-4b,8b,12b-tris(2-oxohexyl)-4b,8b,12b,12d-tetrahydrodibenzo[2,3:4,5]pentaleno[1,6- <i>ab</i> ]indene ( <b>8</b> )               | 3           |
| 2d-Methyl-4b,8b,12b-tris(4-methyl-2-oxopentyl)-4b,8b,12b,12d-tetrahydrodibenzo[2,3:4,5]pentaleno[1,6- <i>ab</i> ]indene ( <b>9</b> )      | 4           |
| 12d-Methyl-4b,8b,12b-tris(3,3-dimethyl-2-oxobutyl)-4b,8b,12b,12d-tetrahydrodibenzo[2,3:4,5]pentaleno[1,6- <i>ab</i> ]indene ( <b>10</b> ) | 4           |
| 12d-Methyl-4b,8b,12b-tris(2-oxoheptyl)-4b,8b,12b,12d-tetrahydrodibenzo[2,3:4,5]pentaleno[1,6- <i>ab</i> ]indene ( <b>11</b> )             | 5           |

- 12d-Methyl-4b,8b,12b-tris(2-oxononyl)-4b,8b,12b,12d-tetrahydrodibenzo[2,3:4,5]pentaleno[1,6-*ab*]indene (**12**) 5
- 12d-Methyl-4b,8b,12b-tri-*n*-propyl-4b,8b,12b,12d-tetrahydrodibenzo[2,3:4,5]pentaleno[1,6-*ab*]indene [12d-methyl-4b,8b,12b-tri(*n*-propyl)tribenzotriquinacene, **14**] 6
- 4b,8b,12b-Tris(formacylmethyl)-12d-methyl-4b,8b,12b,12d-tetrahydrodibenzo[2,3:4,5]pentaleno[1,6-*ab*]indene (12d-methyltribenzotriquinacene 4b,8b,12b-tris-acetaldehyde, **15**) 6
- 4b,8b,12b-Tris(carboxymethyl)-12d-methyl-4b,8b,12b,12d-tetrahydrodibenzo[2,3:4,5]pentaleno[1,6-*ab*]indene [12d-methyltribenzotriquinacene 4b,8b,12b-tris(acetic acid), **16**] 7
- 4b,8b,12b-Tris(methoxycarbonylmethyl)-12d-methyl-4b,8b,12b,12d-tetrahydrodibenzo[2,3:4,5]pentaleno[1,6-*ab*]indene (trimethyl 12d-methyltribenzotriquinacene 4b,8b,12b-tris-acetate, **17**) 7
- 4b,8b,12b-Tris(2-hydroxyethyl)-12d-methyl-4b,8b,12b,12d-tetrahydrodibenzo[2,3:4,5]pentaleno[1,6-*ab*]indene (12d-methyltribenzotriquinacene 4b,8b,12b-tris-ethanol, **18**) 8
- 4b,8b,12b-Tris(2-butoxyethyl)-12d-methyl-4b,8b,12b,12d-tetrahydrodibenzo[2,3:4,5]pentaleno[1,6-*ab*]indene [12d-methyl-4b,8b,12b-tris(3-oxaheptyl)tribenzotriquinacene, **19**] 8
- 12d-Methyl-2,3,6,7,10,11-hexanitro-4b,8b,12b-tri(*n*-propyl)-4b,8b,12b,12d-tetrahydrodibenzo[2,3:4,5]pentaleno[1,6-*ab*]indene [12d-methyl-2,3,6,7,10,11-hexanitro-4b,8b,12b-tri(*n*-propyl)tribenzotriquinacene, **20**] 9
- 4b,8b,12b-Tris(carboxymethyl)-12d-methyl-2,3,6,7,10,11-hexanitro-4b,8b,12b,12d-tetrahydrodibenzo[2,3:4,5]pentaleno[1,6-*ab*]indene [12d-methyl-2,3,6,7,10,11-hexanitrotribenzotriquinacene 4b,8b,12b-tris(acetic acid), **21**] 9

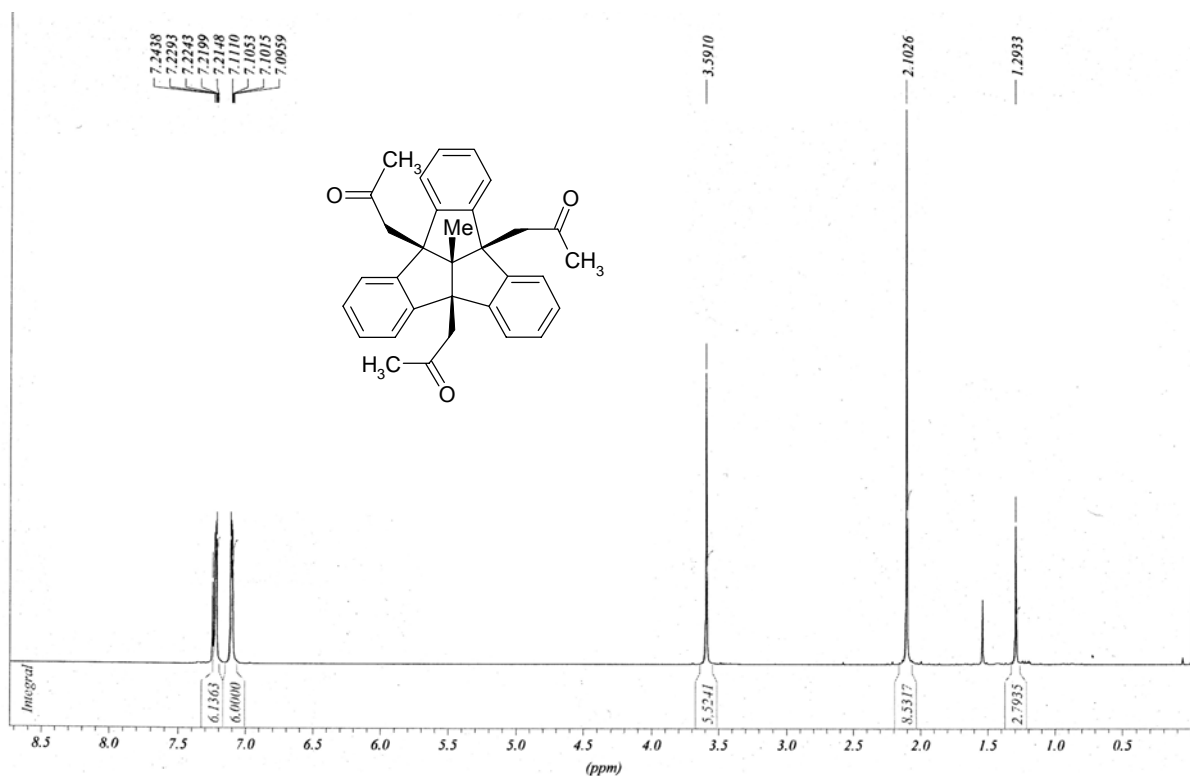

12d-Methyl-4b,8b,12b-tris(2-oxopropyl)-4b,8b,12b,12d-tetrahydrodibenzo[2,3:4,5]pentaleno[1,6-*ab*]indene (**7**) (600 MHz, CDCl<sub>3</sub>)

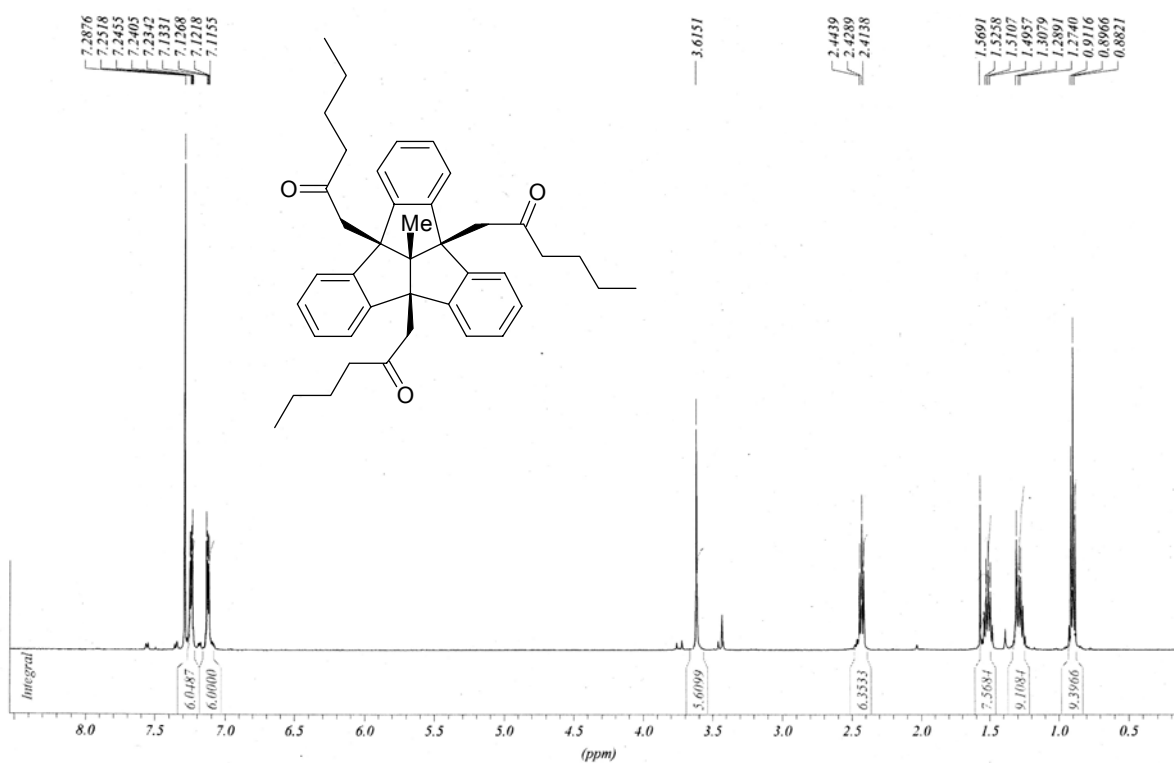

12d-Methyl-4b,8b,12b-tris(2-oxohexyl)-4b,8b,12b,12d-tetrahydrodibenzo[2,3:4,5]pentaleno[1,6-*ab*]indene (**8**) (500 MHz, CDCl<sub>3</sub>)

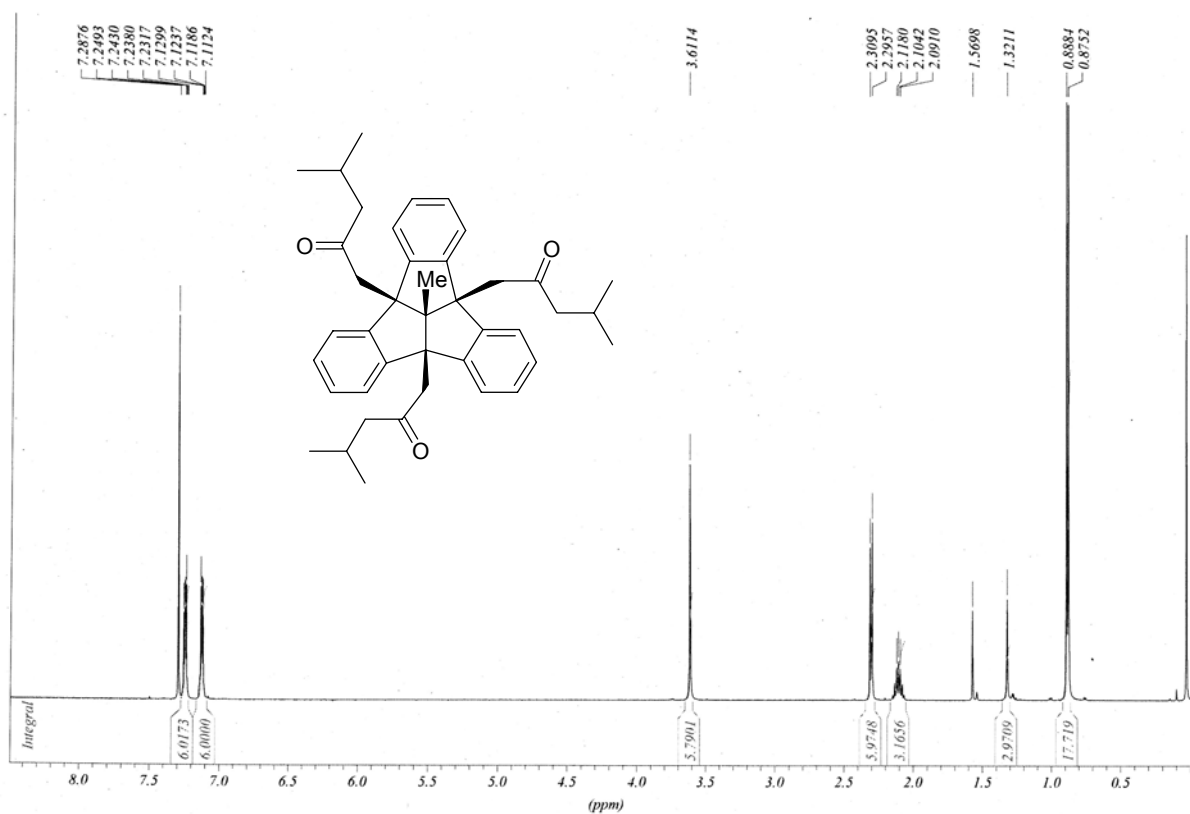

12d-Methyl-4b,8b,12b-tris(4-methyl-2-oxopentyl)-4b,8b,12b,12d-tetrahydrodibenzo[2,3:4,5]pentaleno[1,6-ab]indene (**9**) (500 MHz, CDCl<sub>3</sub>)

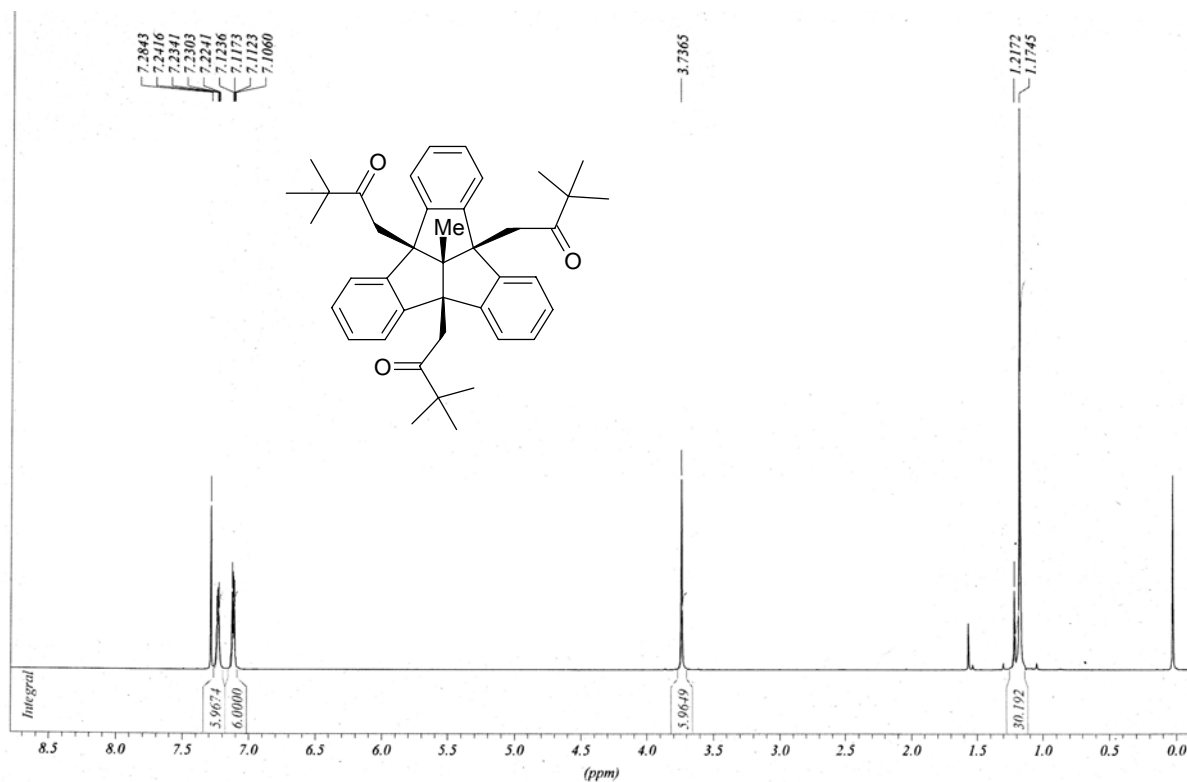

12d-Methyl-4b,8b,12b-tris(3,3-dimethyl-2-oxobutyl)-4b,8b,12b,12d-tetrahydrodibenzo[2,3:4,5]pentaleno[1,6-ab]indene (**10**) (500 MHz, CDCl<sub>3</sub>)

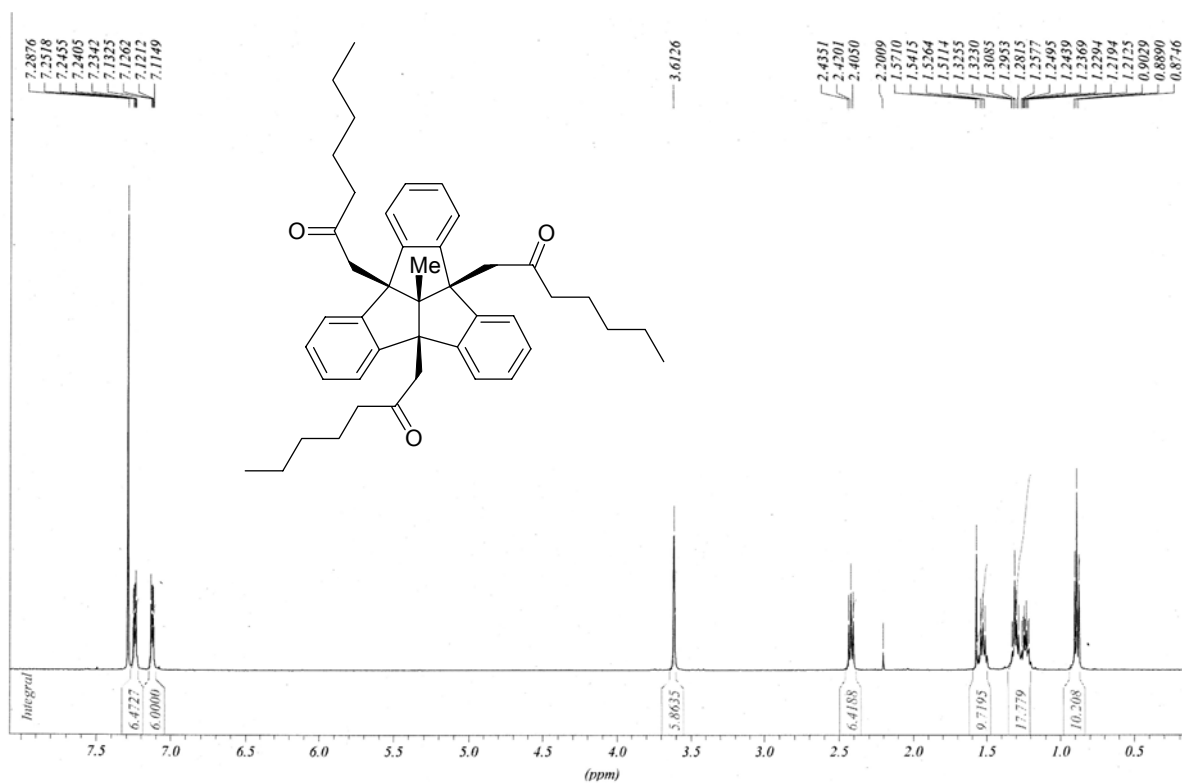

12d-Methyl-4b,8b,12b-tris(2-oxoheptyl)-4b,8b,12b,12d-tetrahydrodibenzo[2,3:4,5]pentaleno[1,6-*ab*]indene (**11**) (500 MHz, CDCl<sub>3</sub>)

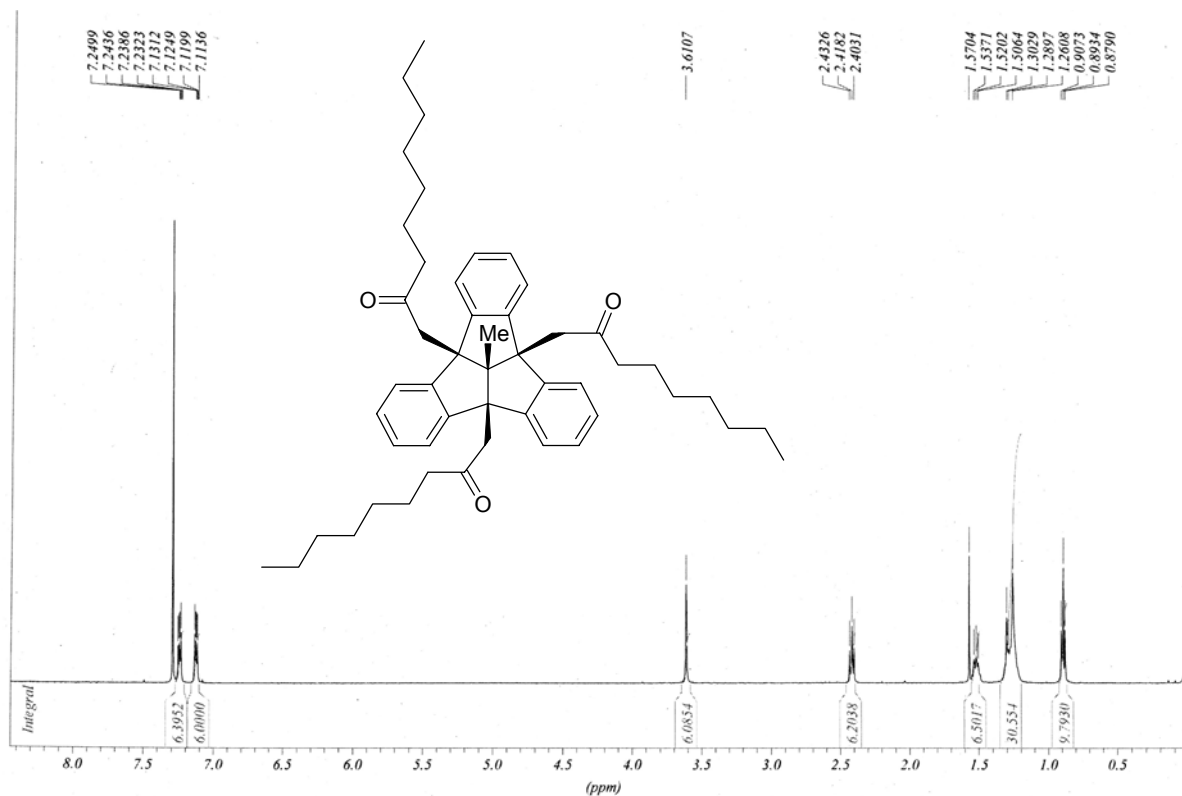

12d-Methyl-4b,8b,12b-tris(2-oxononyl)-4b,8b,12b,12d-tetrahydrodibenzo[2,3:4,5]pentaleno[1,6-*ab*]indene (**12**) (500 MHz, CDCl<sub>3</sub>)

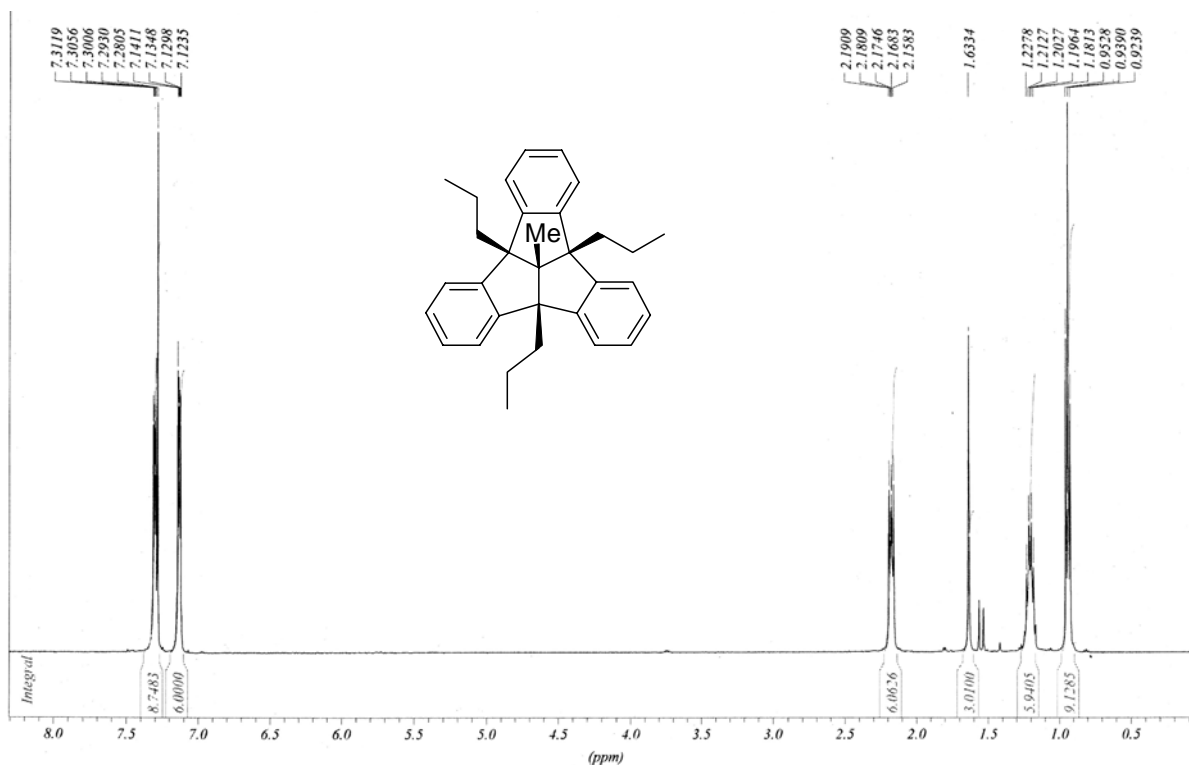

12d-Methyl-4b,8b,12b-tri-*n*-propyl-4b,8b,12b,12d-tetrahydro-dibenzo[2,3:4,5]pentaleno[1,6-*ab*]indene  
 [12d-methyl-4b,8b,12b-tri(*n*-propyl)tribenzotriquinacene, **14**] (500 MHz, CDCl<sub>3</sub>)

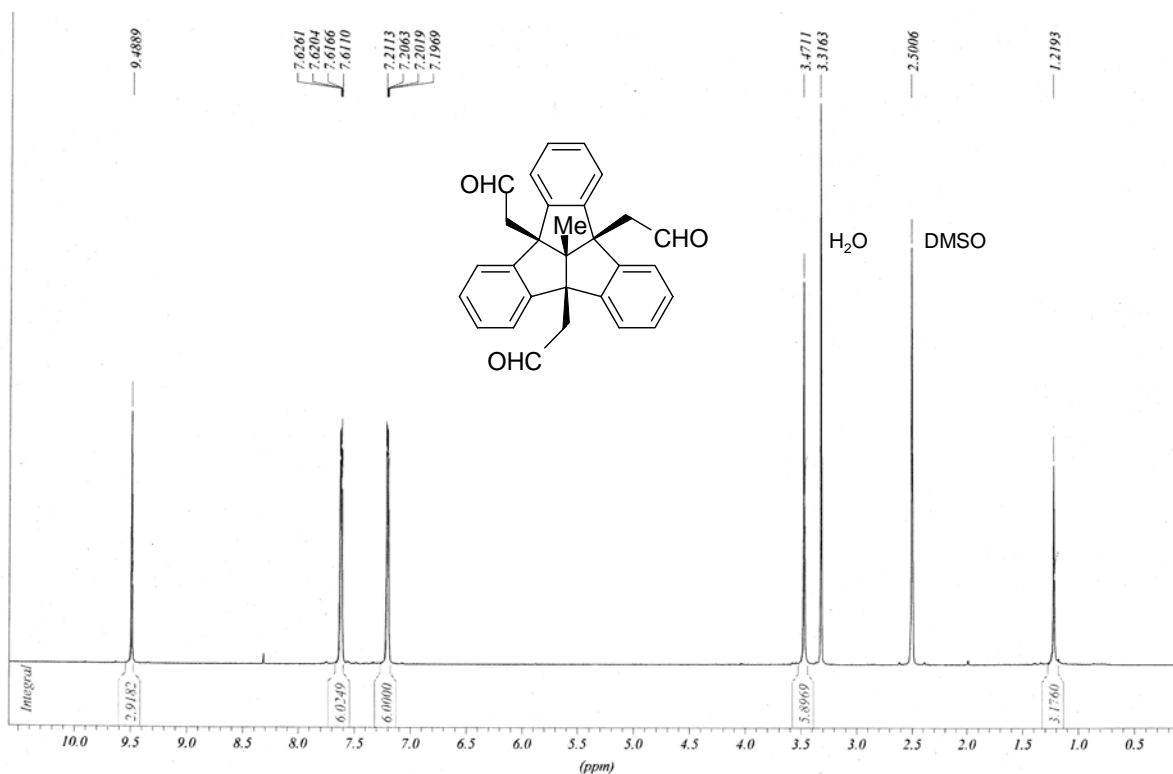

4b,8b,12b-Tris(formacymethyl)-12d-methyl-4b,8b,12b,12d-tetrahydro-dibenzo[2,3:4,5]pentaleno[1,6-*ab*]indene  
 (12d-methyltribenzotriquinacene 4b,8b,12b-tris-acetaldehyde, **15**) (500 MHz, DMSO-d<sub>6</sub>)

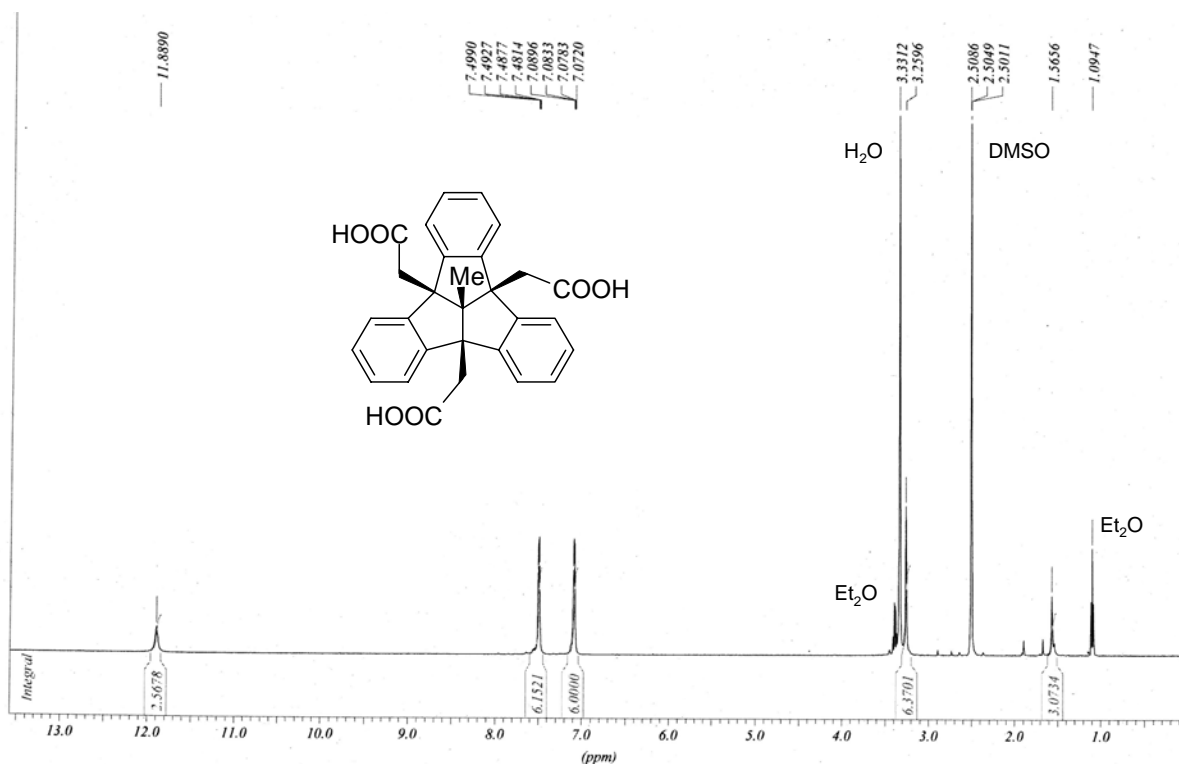

4b,8b,12b-Tris(carboxymethyl)-12d-methyl-4b,8b,12b,12d-tetrahydro-dibenzo[2,3:4,5]pentaleno[1,6-ab]indene  
 [12d-methyltribenzotriquinacene 4b,8b,12b-tris(acetic acid), **16**] (500 MHz, DMSO-d<sub>6</sub>)

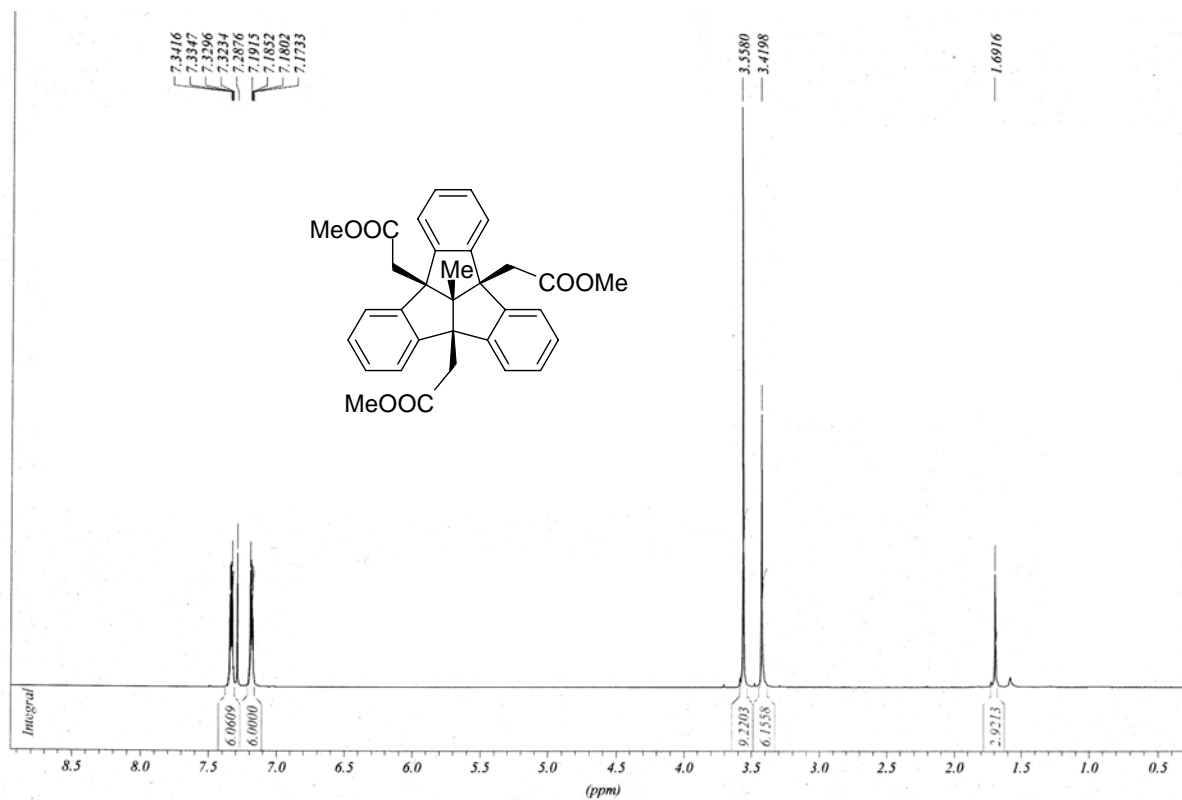

4b,8b,12b-Tris(methoxycarbonylmethyl)-12d-methyl-4b,8b,12b,12d-tetrahydro-dibenzo[2,3:4,5]pentaleno[1,6-ab]indene  
 (trimethyl 12d-methyltribenzotriquinacene 4b,8b,12b-tris-acetate, **17**) (500 MHz, CDCl<sub>3</sub>)

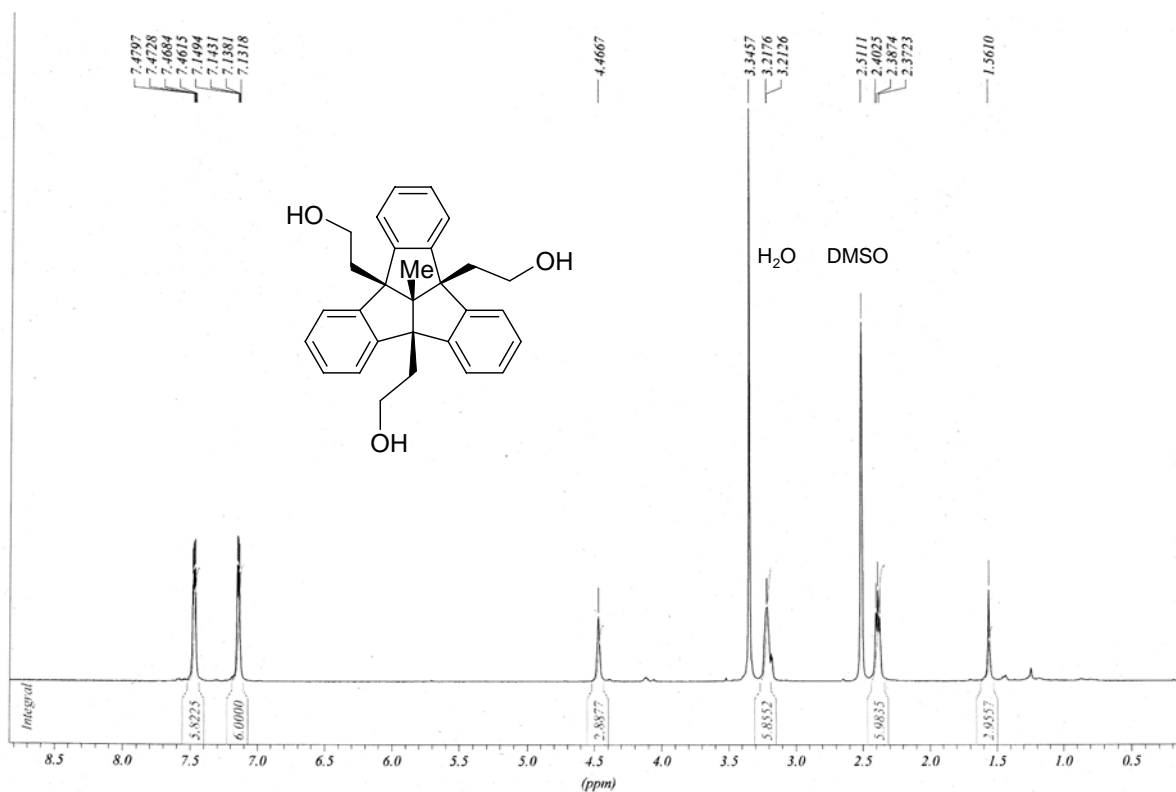

4b,8b,12b-Tris(2-hydroxyethyl)-12d-methyl-4b,8b,12b,12d-tetrahydro-dibenzo[2,3:4,5]pentaleno[1,6-ab]indene  
 (12d-methyltribenzotriquinacene 4b,8b,12b-tris-ethanol, **18**) (500 MHz, DMSO- $d_6$ )

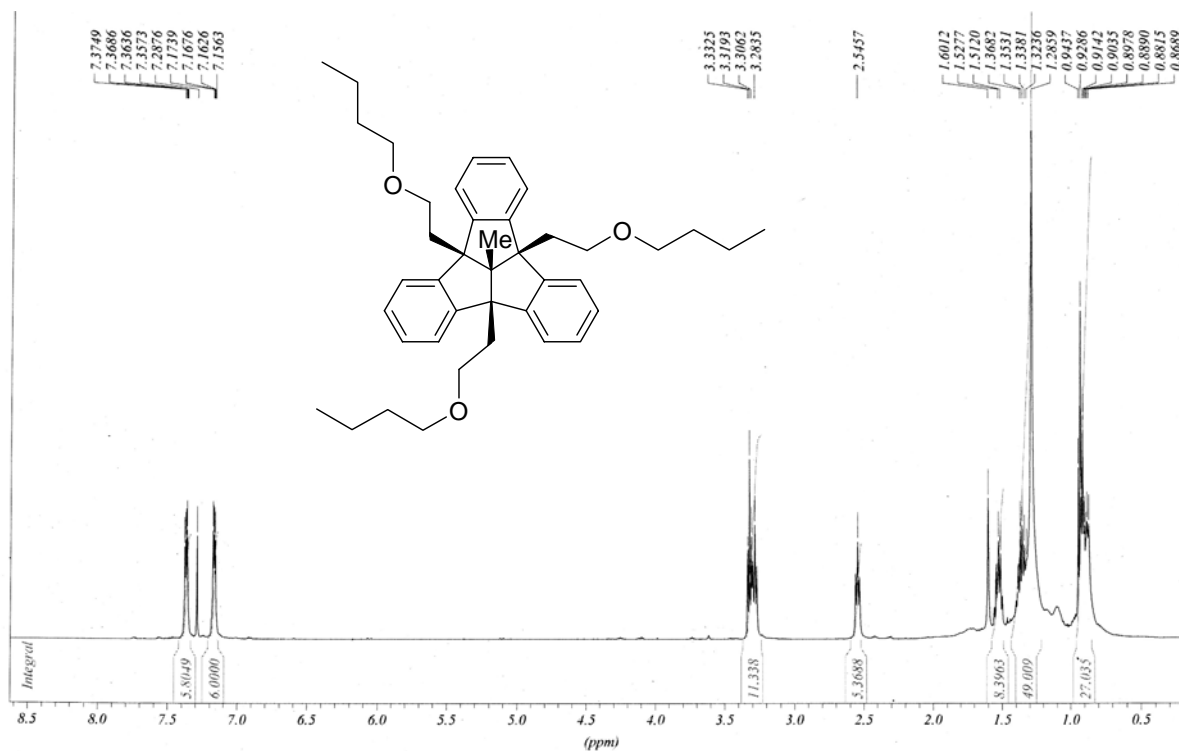

4b,8b,12b-Tris(2-butoxyethyl)-12d-methyl-4b,8b,12b,12d-tetrahydro-dibenzo[2,3:4,5]pentaleno[1,6-ab]indene  
 [12d-methyl-4b,8b,12b-tris(3-oxaheptyl)tribenzotriquinacene, **19**] (500 MHz,  $CDCl_3$ )



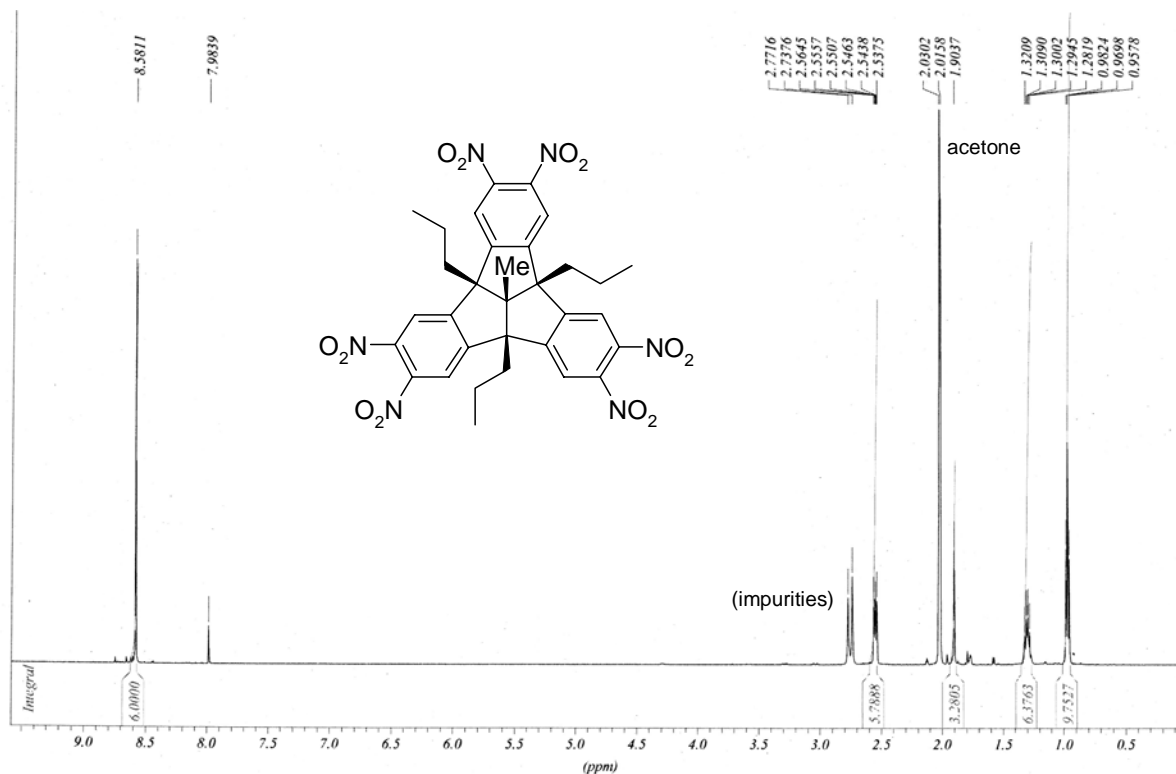

12d-Methyl-2,3,6,7,10,11-hexanitro-4b,8b,12b-tri(*n*-propyl)-4b,8b,12b,12d-tetrahydrodibenzo[2,3:4,5]pentaleno[1,6-*ab*]indene  
 [12d-methyl-2,3,6,7,10,11-hexanitrotribenzotriquinacene, **20**]  
 (500 MHz, acetone-*d*<sub>6</sub>)

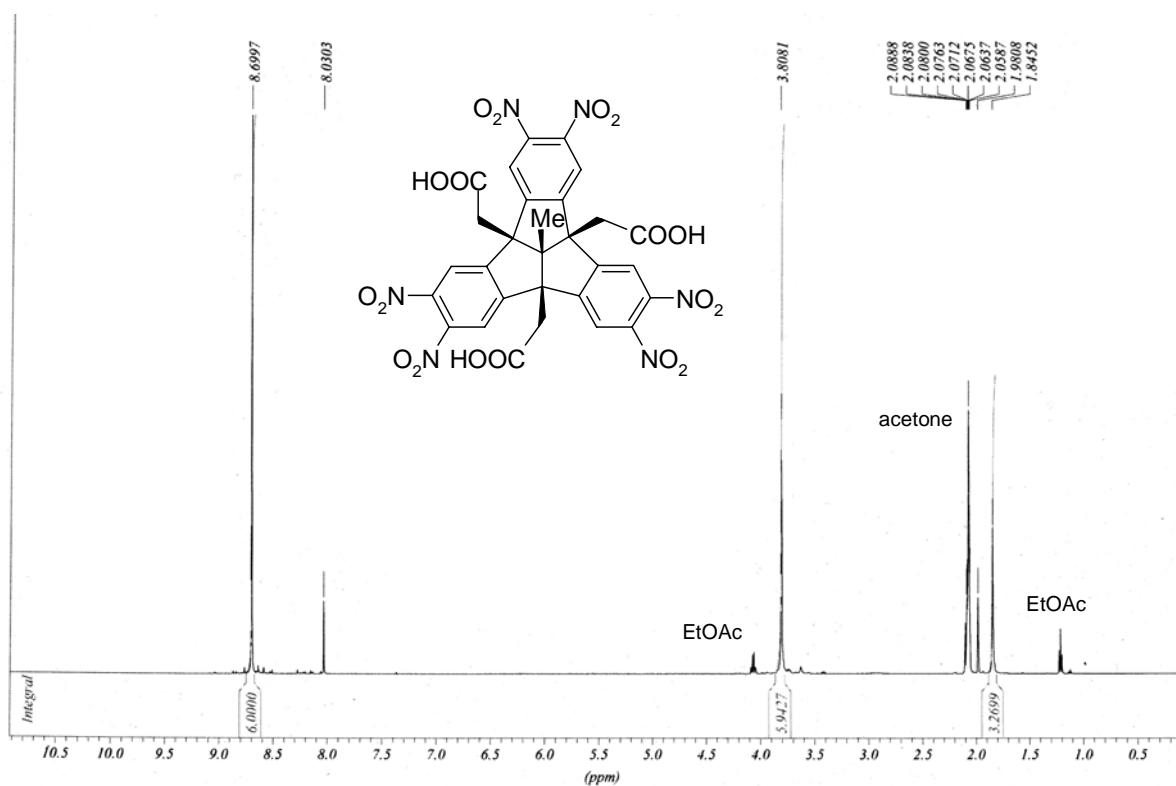

4b,8b,12b-Tris(carboxymethyl)-12d-methyl-2,3,6,7,10,11-hexanitro-4b,8b,12b,12d-tetrahydrodibenzo[2,3:4,5]pentaleno[1,6-*ab*]indene  
 [12d-methyl-2,3,6,7,10,11-hexanitrotribenzotriquinacene 4b,8b,12b-tris(acetic acid), **21**]  
 (500 MHz, acetone-*d*<sub>6</sub>)
